# Supplementary material
Source: PubMed Central journal article supplement (PMC4970217)
Supplement: NIHMS806383-supplement-Supp.pdf [file NIHMS806383-supplement-Supp.pdf]

# Shotgun analysis of rough-type lipopolysaccharides using ultraviolet photodissociation mass spectrometry

Dustin R. Klein, Dustin D. Holden, Jennifer S. Brodbelt

Department of Chemistry  
The University of Texas at Austin  
1 University Station A5300  
Austin, TX 78712, USA

**Supporting Information:** The contents of the supporting information include figures showing the modified Orbitrap mass spectrometer, examples of ESI mass spectra of *E. coli* LPS, carbohydrate fragmentation nomenclature, an energy-variable CID diagram of penta-acylated LPS, a CID-CID mass spectrum of tetra-acylated LPS, CID spectra of two isobaric LPS, CID-HCD and CID-UVPD mass spectra of two isobaric LPS, and tables of identified fragment ions.

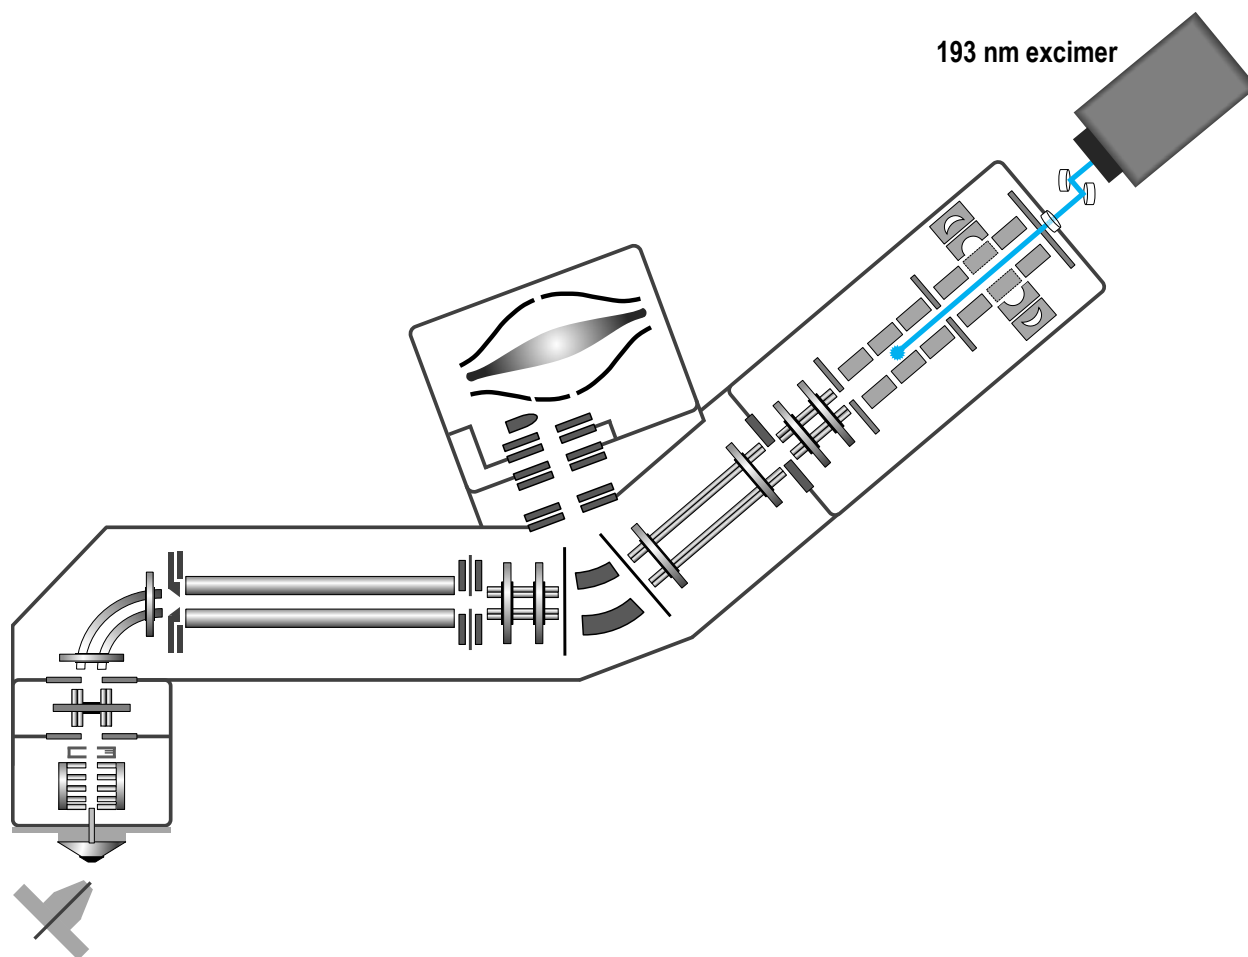

**Figure S1.** Schematic of a Thermo Orbitrap Fusion modified with a 193 nm excimer laser.

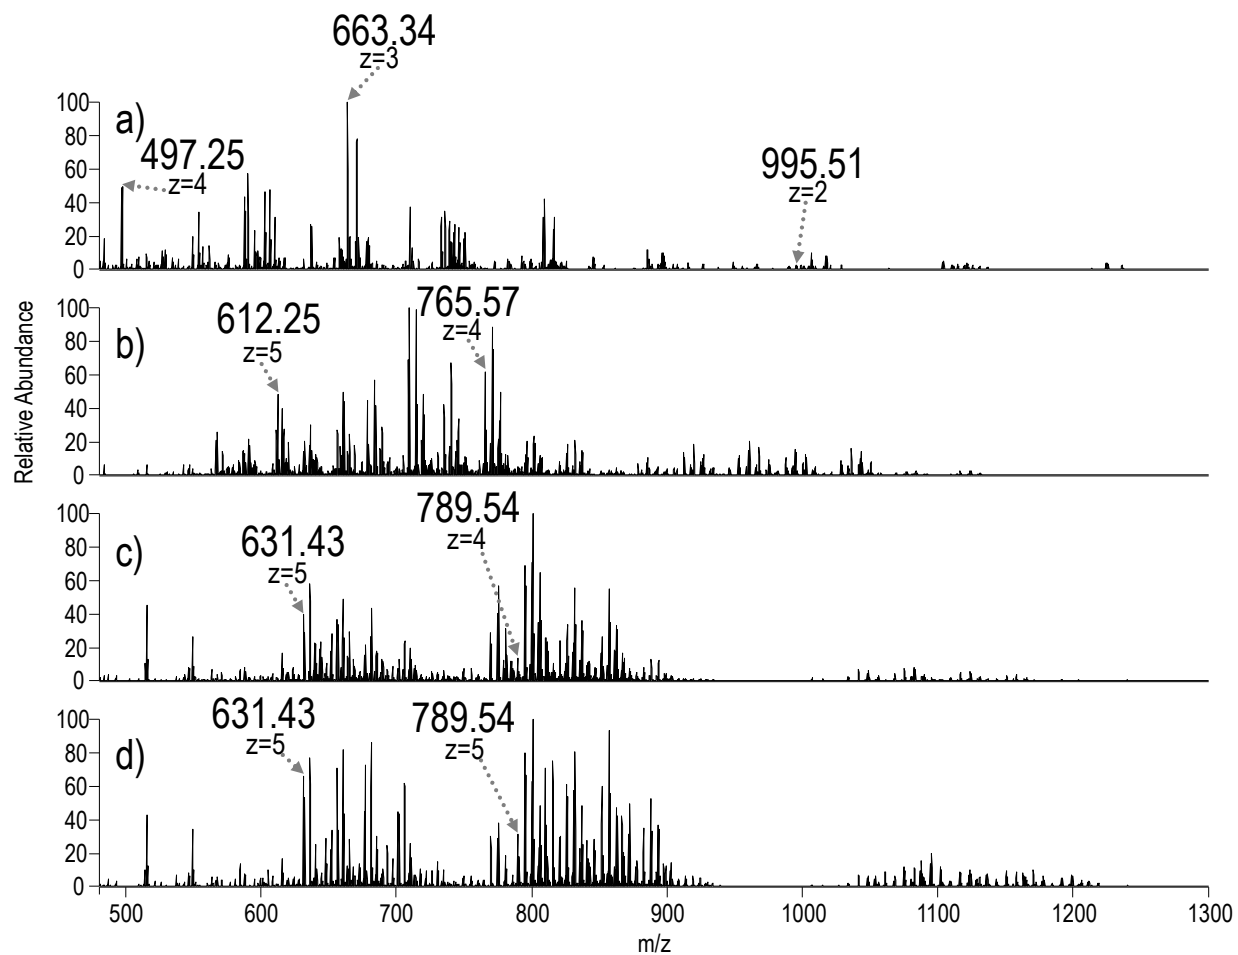

**Figure S2.** ESI mass spectra (100  $\mu\text{g/mL}$ ) of a) *S. enterica* Rd1, b) *S. enterica* Rb, c) *E. coli* R2 and d) *E. coli* R3 infused without chromatographic separation into the mass spectrometer via static emitters.

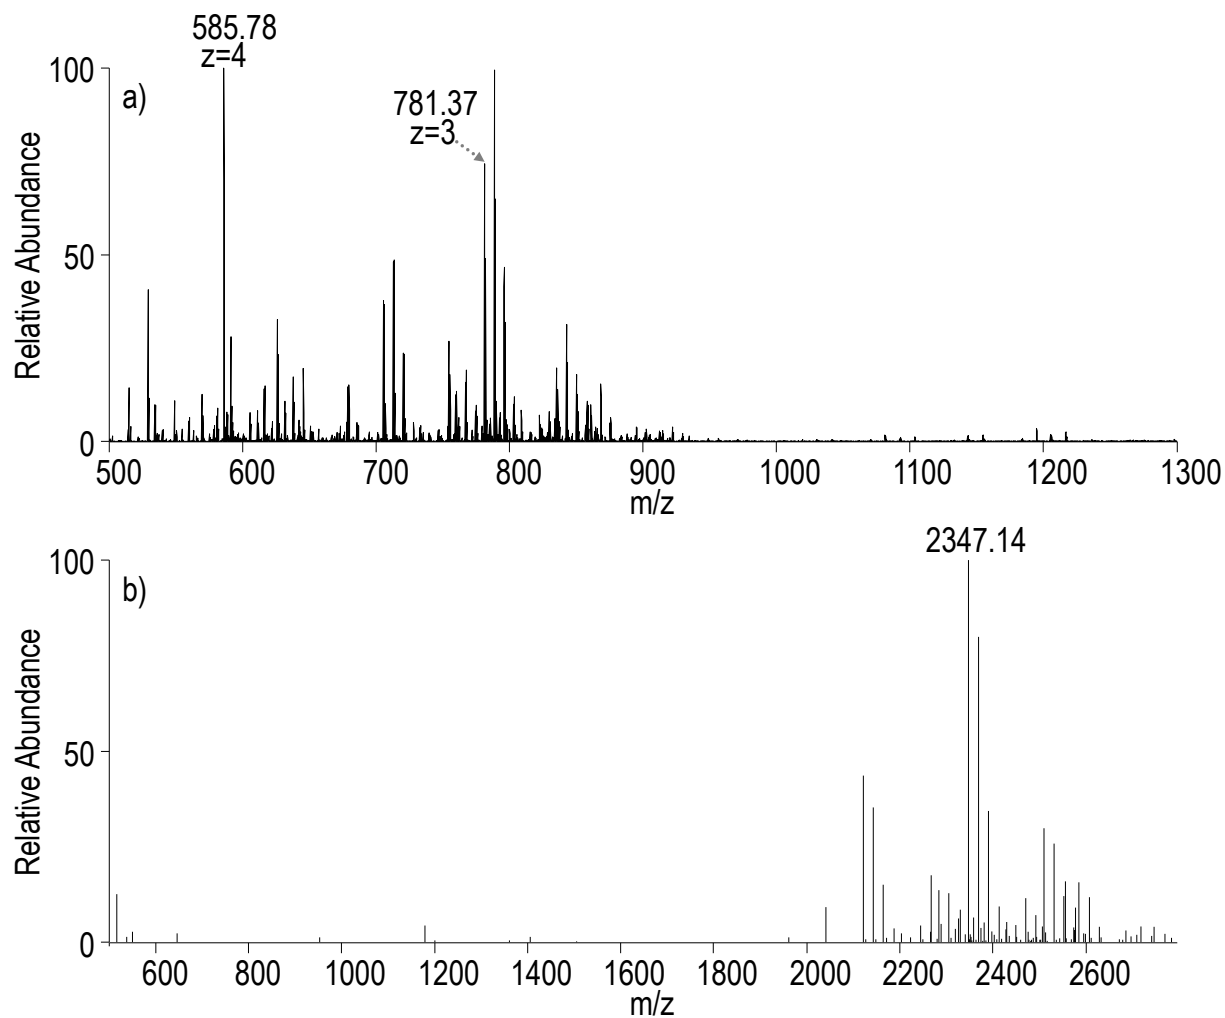

**Figure S3.** a) ESI mass spectrum of *S. enterica* Rc (100 ug/mL) infused without chromatographic separation into the mass spectrometer via a static emitter, and b) deconvoluted spectrum.

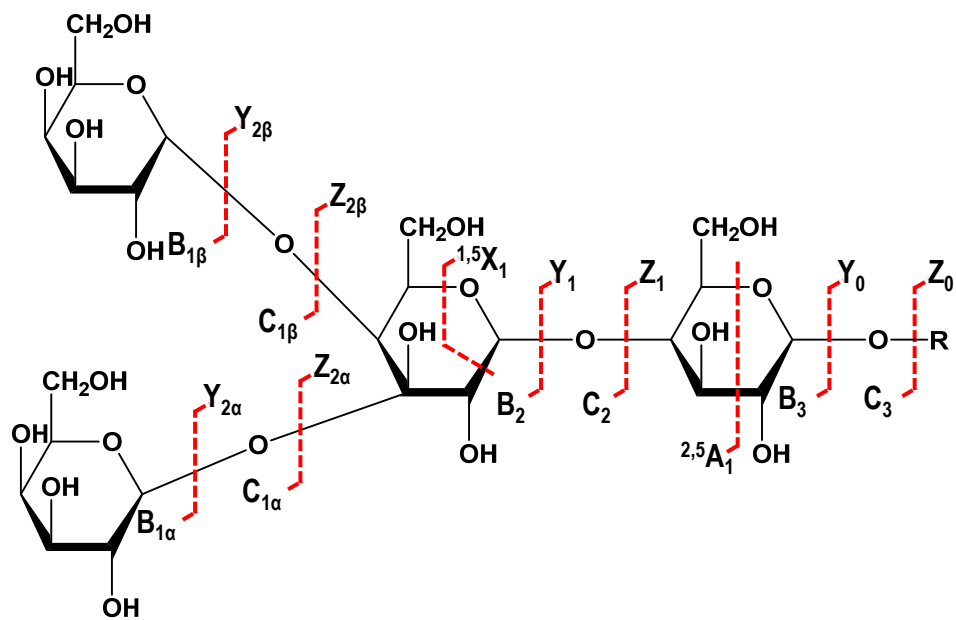

**Figure S4.** Domon and Costello carbohydrate fragmentation nomenclature (Reference 41)

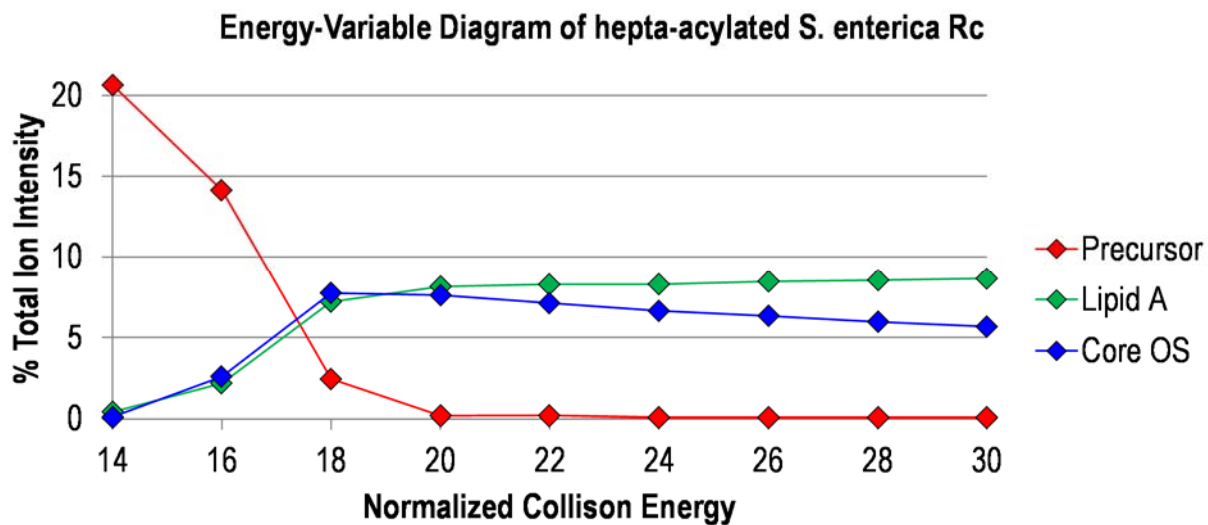

**Figure S5.** CID energy-variable diagram of penta-acylated *S. enterica* Rc monitoring the precursor ion ( $m/z$  642.57) and products ions corresponding to the oligosaccharide substructure ( $m/z$  492.14) and lipid A substructure ( $m/z$  792.5).

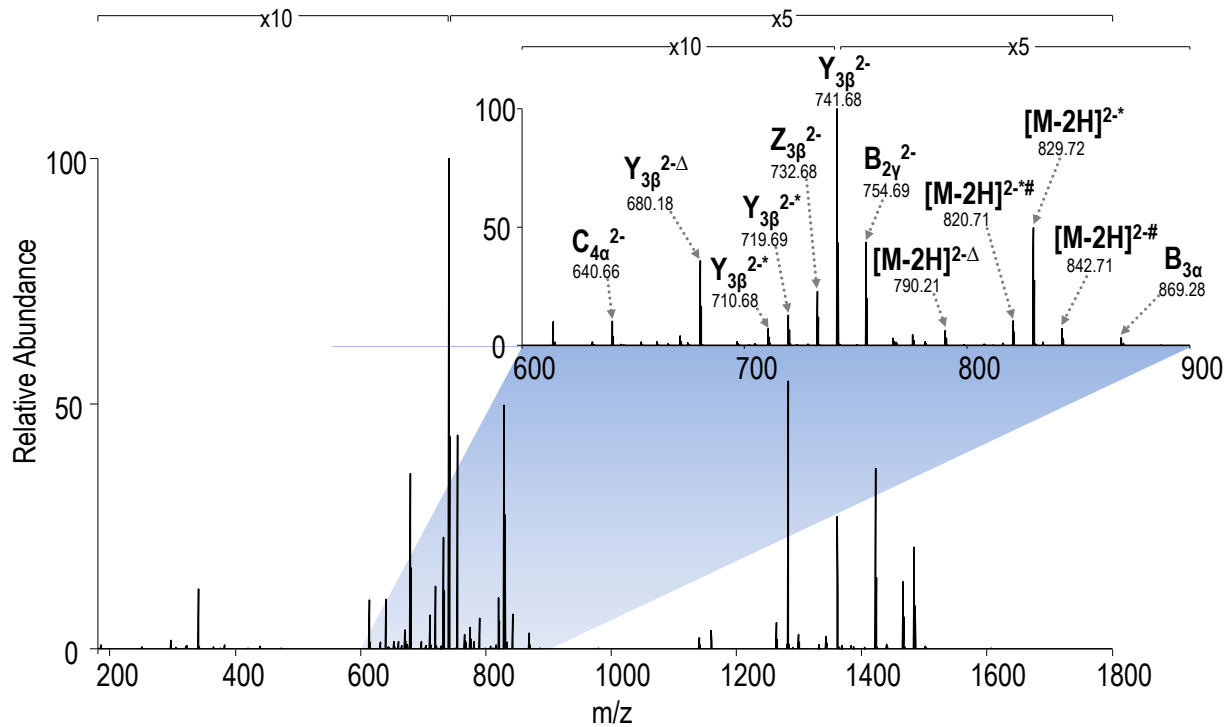

**Figure S6.** CID-CID mass spectrum (NCE 18- NCE 30) of the core oligosaccharide substructure of tetra-acylated *S. enterica* Rb containing a pyrophosphoethanolamine modification ( $m/z$  851.81). The inset shows expansion of the range from  $m/z$  600 to 900.  $\Delta$  = loss of phosphethanolamine; \* = loss of  $\text{CO}_2$ ; # = loss of  $\text{H}_2\text{O}$

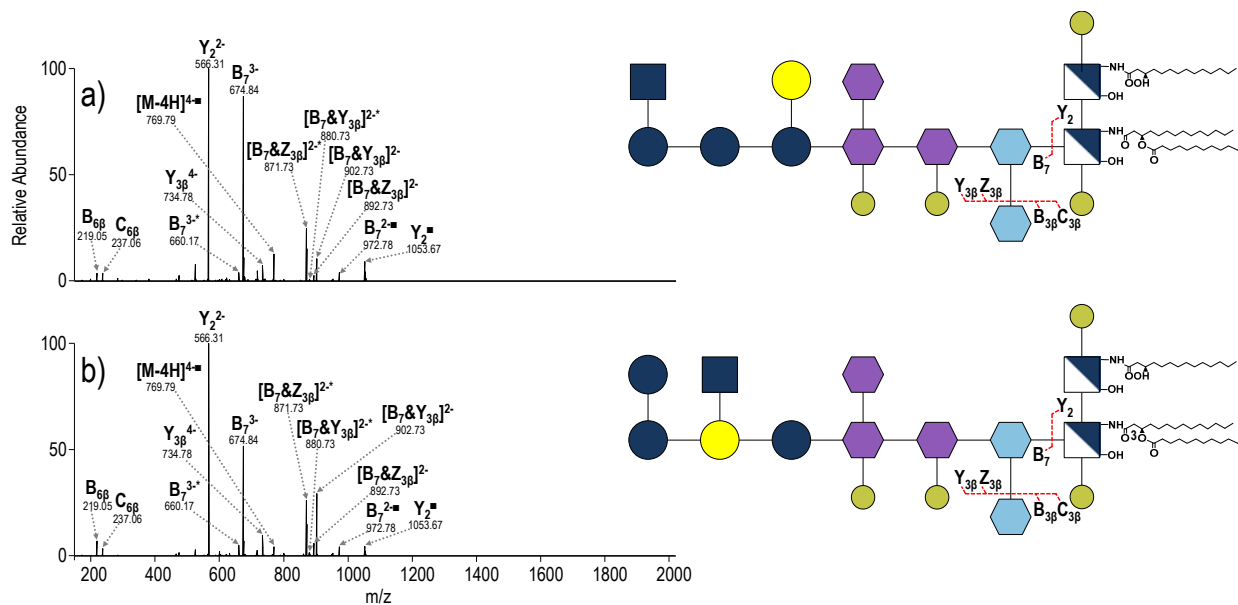

**Figure S7.** a) CID (NCE 18) of *E. coli* R2 (MW = 3162.16 Da, precursor m/z 631.43, charge state 5-) b) CID (NCE 18) of *E. coli* R3 (MW = 3162.16 Da, precursor m/z 631.43, charge state 5-); ■= neutral loss of  $HPO_3$ ; & indicates that both of the indicated cleavages occur to generated a particular fragment ion.



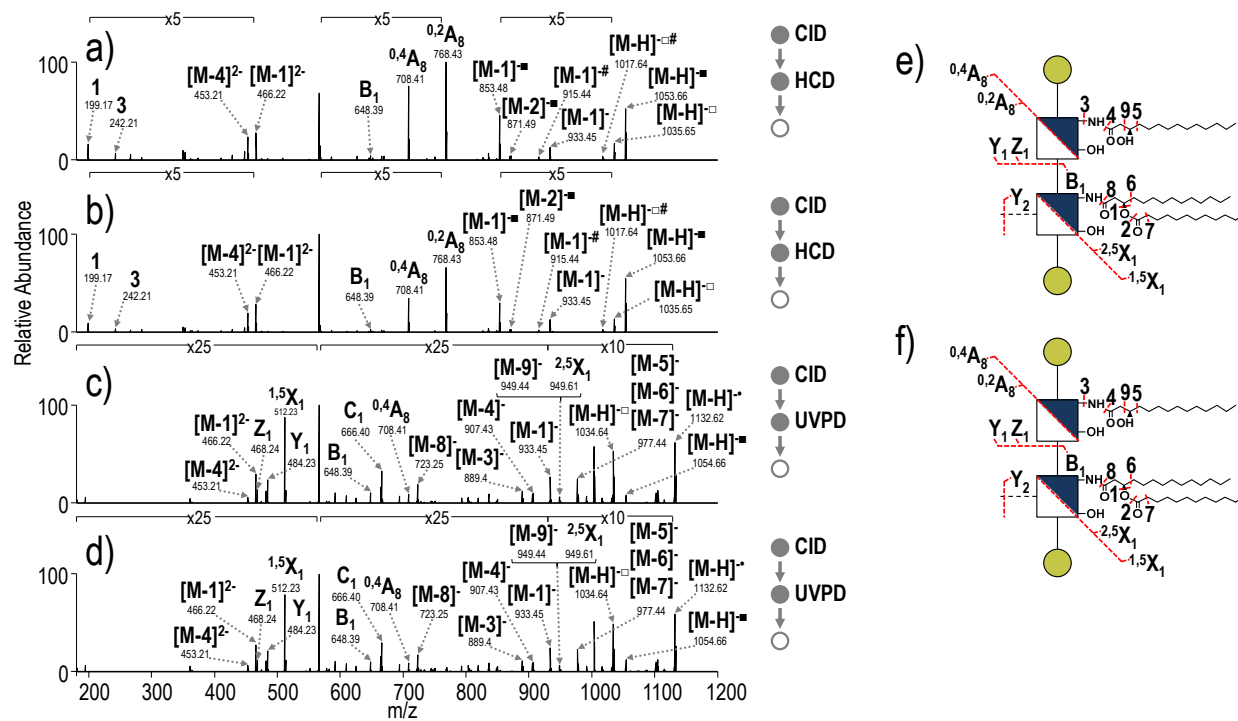

**Figure S8.** a) CID-HCD (NCE 18- NCE 30) of the lipid A substructure of *E. coli* R2 (m/z 566.31, charge state 2-) b) CID-HCD (NCE 18- NCE 30) of the lipid A substructure of *E. coli* R3 (m/z 566.31, charge state 2-), c) CID-UVPD (NCE 18- 5 pulses, 2 mJ) of the lipid A substructure substructure of *E. coli* R2 (m/z 566.31, charge state 2-) and d) CID-UVPD (NCE 18- 5 pulses, 2 mJ) of the lipid A substructure of *E. coli* R3 (m/z 566.31, charge state 2-). ■= neutral loss of HPO<sub>3</sub>, □= neutral loss of HPO<sub>3</sub>, #= neutral loss of H<sub>2</sub>O. A bracket under a pair of ions indicates the presence of two resolved ions, but the mass difference is too small to allow inclusion of separate arrows. The acyl chains are numbered, and the loss of a particular acyl chain is denoted as M – N where M represents the LPS and N represents the acyl chain that is lost.

**Table S1.** List of identified ions in Figure 4

| Figure 4a |                                | Figure 4b |                                                  | Figure 4c |                                                                                             | Figure 4d |                                                              | Figure 4e |                                                              | Figure 4f |                                                 |
|-----------|--------------------------------|-----------|--------------------------------------------------|-----------|---------------------------------------------------------------------------------------------|-----------|--------------------------------------------------------------|-----------|--------------------------------------------------------------|-----------|-------------------------------------------------|
| m/z       | Fragment                       | m/z       | Fragment                                         | m/z       | Fragment                                                                                    | m/z       | Fragment                                                     | m/z       | Fragment                                                     | m/z       | Fragment                                        |
| 1484.37   | Y <sub>3β</sub>                | 1501.45   | [M-▼]                                            | 1703.42   | [M-H] <sup>-</sup>                                                                          | 1279.85   | [M-H] <sup>•</sup>                                           | 1279.85   | [M-H] <sup>•</sup>                                           | 1358.81   | [M-H] <sup>-</sup>                              |
| 1466.36   | Z <sub>3β</sub>                | 1484.37   | Y <sub>3β</sub>                                  | 1685.41   | [M-H] <sup>-#</sup>                                                                         | 1261.84   | [M-H] <sup>□</sup>                                           | 1261.84   | [M-H] <sup>□</sup>                                           | 1298.79   | <sup>0,4</sup> X <sub>1</sub>                   |
| 1440.38   | Y <sub>3β</sub> <sup>*</sup>   | 1466.36   | Z <sub>3β</sub>                                  | 1673.41   | [M-CH <sub>3</sub> O] <sup>#</sup>                                                          | 1159.64   | [M-3] <sup>†</sup>                                           | 1159.64   | [M-3] <sup>†</sup>                                           | 1203.63   | [M-7] <sup>-</sup> , [M-9] <sup>-</sup>         |
| 1422.37   | Z <sub>3β</sub> <sup>*</sup>   | 1440.38   | Y <sub>3β</sub> <sup>*</sup>                     | 1661.39   | [M-C <sub>2</sub> H <sub>6</sub> N] <sup>+</sup>                                            | 1115.61   | [M-1] <sup>†</sup>                                           | 1115.61   | [M-1] <sup>†</sup>                                           | 1175.80   | <sup>2,5</sup> X <sub>1</sub>                   |
| 1361.36   | Y <sub>3β</sub> <sup>Δ</sup>   | 1422.37   | Z <sub>3β</sub> <sup>*</sup>                     | 1630.39   | <sup>3,5</sup> X <sub>6α</sub> , <sup>3,5</sup> X <sub>6β</sub>                             | 1095.67   | [M-4] <sup>•</sup>                                           | 1095.67   | [M-4] <sup>•</sup>                                           | 1174.63   | [M-6] <sup>-</sup> , [M-8] <sup>-</sup>         |
| 1343.35   | Z <sub>3β</sub> <sup>Δ</sup>   | 1361.36   | Y <sub>3β</sub> <sup>Δ</sup>                     | 1601.39   | <sup>2,5</sup> X <sub>6α</sub> , <sup>2,5</sup> X <sub>6β</sub>                             | 1079.67   | [M-3] <sup>•</sup>                                           | 1079.67   | [M-3] <sup>•</sup>                                           | 1159.81   | <sup>0,2</sup> X <sub>1</sub>                   |
| 1282.32   | C <sub>4α</sub>                | 1343.35   | Z <sub>3β</sub> <sup>Δ</sup>                     | 1570.37   | <sup>1,5</sup> X <sub>6α</sub> , <sup>1,5</sup> X <sub>6β</sub>                             | 1035.65   | [M-1] <sup>•</sup> , [M-2] <sup>□</sup> , [M-5] <sup>□</sup> | 1035.65   | [M-1] <sup>•</sup> , [M-2] <sup>□</sup> , [M-5] <sup>□</sup> | 1159.64   | [M-3] <sup>-</sup>                              |
| 1264.31   | B <sub>4α</sub>                | 1282.32   | C <sub>4α</sub>                                  | 1540.36   | Y <sub>6α</sub> , Y <sub>6β</sub>                                                           | 994.62    | <sup>1,3</sup> A <sub>7</sub>                                | 994.62    | <sup>1,3</sup> A <sub>7</sub>                                | 949.44    | [M-11] <sup>-</sup>                             |
| 1159.32   | C <sub>4α</sub> <sup>Δ</sup>   | 1264.31   | B <sub>4α</sub>                                  | 1525.37   | Z <sub>6α</sub> , Z <sub>6β</sub>                                                           | 915.44    | [M-1-3] <sup>-</sup>                                         | 915.44    | [M-1-3] <sup>-</sup>                                         | 920.42    | <sup>1,2</sup> X <sub>1</sub>                   |
| 1141.31   | B <sub>4α</sub> <sup>Δ</sup>   | 1159.32   | C <sub>4α</sub> <sup>Δ</sup>                     | 1512.37   | Y <sub>5γ</sub>                                                                             | 708.41    | Y <sub>1</sub>                                               | 708.41    | Y <sub>1</sub>                                               | 892.42    | <sup>1,3</sup> X <sub>1</sub>                   |
| 869.28    | B <sub>3α</sub>                | 1141.31   | B <sub>4α</sub> <sup>Δ</sup>                     | 1467.37   | Z <sub>3β</sub>                                                                             | 670.40    | Z <sub>2</sub> <sup>2-</sup>                                 | 664.38    | C <sub>6</sub>                                               | 874.41    | [M-1-10] <sup>-</sup>                           |
| 842.71    | [M-2H] <sup>2-#</sup>          | 1123.29   | B <sub>4α</sub> <sup>Δ#</sup>                    | 1422.37   | Z <sub>3β</sub> <sup>*</sup>                                                                | 587.31    | [M-4] <sup>†2-</sup>                                         | 587.31    | [M-4] <sup>†2-</sup>                                         | 817.38    | <sup>1,4</sup> A <sub>7</sub>                   |
| 829.72    | [M-2H] <sup>2-*</sup>          | 967.25    | [C <sub>4α</sub> &Y <sub>5γ</sub> ] <sup>Δ</sup> | 1282.32   | C <sub>4β</sub> <sup>*</sup>                                                                | 579.32    | [M-3] <sup>†2-</sup>                                         | 579.32    | [M-3] <sup>†2-</sup>                                         | 738.42    | <sup>1,5</sup> X <sub>1</sub>                   |
| 820.71    | [M-2H] <sup>2-#*</sup>         | 869.28    | B <sub>3α</sub>                                  | 1263.31   | B <sub>4β</sub>                                                                             | 566.31    | [M-2] <sup>†2-</sup> , [M-5] <sup>†2-</sup>                  | 566.31    | [M-2] <sup>†2-</sup> , [M-5] <sup>†2-</sup>                  | 710.42    | Y <sub>1</sub>                                  |
| 790.21    | [M-2H] <sup>2-Δ</sup>          | 851.71    | B <sub>5α</sub>                                  | 1246.27   | <sup>1,5</sup> X <sub>5α</sub>                                                              | 557.30    | [M-1] <sup>†2-</sup>                                         | 557.30    | [M-1] <sup>†2-</sup>                                         | 692.41    | Z <sub>1</sub>                                  |
| 754.69    | B <sub>2γ</sub> <sup>2-</sup>  | 842.71    | [M-2H] <sup>2-#</sup>                            | 1218.27   | Y <sub>5α</sub>                                                                             | 466.22    | [M-2-3] <sup>†2-</sup> , [M-1-4] <sup>†2-</sup>              | 466.22    | [M-2-3] <sup>†2-</sup> , [M-1-4] <sup>†2-</sup>              | 664.38    | C <sub>6</sub>                                  |
| 741.68    | Y <sub>3β</sub> <sup>2-</sup>  | 829.72    | [M-2H] <sup>2-*</sup>                            | 1200.26   | Z <sub>5α</sub>                                                                             | 457.21    | [M-1-3] <sup>†2-</sup>                                       | 457.21    | [M-1-3] <sup>†2-</sup>                                       | 587.31    | [M-4] <sup>†2-</sup>                            |
| 732.68    | Z <sub>3β</sub> <sup>2-</sup>  | 820.71    | [M-2H] <sup>2-#*</sup>                           | 862.15    | <sup>1,5</sup> X <sub>4α</sub>                                                              | 444.21    | [M-1-5] <sup>†2-</sup>                                       | 448.21    | [M-1-3] <sup>†2-#</sup>                                      | 579.32    | [M-3] <sup>†2-</sup>                            |
| 719.69    | Y <sub>3β</sub> <sup>2-*</sup> | 790.21    | [M-2H] <sup>2-Δ</sup>                            | 851.71    | B <sub>5</sub>                                                                              | 243.20    | 1                                                            | 444.21    | [M-1-5] <sup>†2-</sup>                                       | 566.31    | [M-2] <sup>†</sup> , [M-5] <sup>†</sup>         |
| 710.68    | Z <sub>3β</sub> <sup>2-*</sup> | 754.69    | B <sub>2γ</sub> <sup>2-</sup>                    | 842.20    | [M-2H] <sup>2-#</sup>                                                                       | 199.19    | 3                                                            | 243.20    | 1                                                            | 474.22    | [M-2-4] <sup>†2-</sup>                          |
| 680.18    | Y <sub>3β</sub> <sup>2-Δ</sup> | 741.68    | Y <sub>3β</sub> <sup>2-</sup>                    | 829.21    | [M-C <sub>2</sub> H <sub>6</sub> N] <sup>2-</sup>                                           |           |                                                              | 242.21    | 10                                                           | 466.22    | [M-2-3] <sup>†2-</sup> , [M-1-4] <sup>†2-</sup> |
| 640.66    | C <sub>4α</sub> <sup>2-</sup>  | 732.68    | Z <sub>3β</sub> <sup>2-</sup>                    | 799.69    | <sup>2,5</sup> X <sub>6α</sub> <sup>2-</sup> , <sup>2,5</sup> X <sub>6β</sub> <sup>2-</sup> |           |                                                              | 199.19    | 3                                                            | 243.20    | 1                                               |
| 421.10    | Y <sub>3α</sub> <sup>*</sup>   | 719.69    | Y <sub>3β</sub> <sup>2-*</sup>                   | 770.68    | Y <sub>6α</sub> <sup>2-</sup> , Y <sub>6β</sub> <sup>2-</sup>                               |           |                                                              |           |                                                              |           |                                                 |
| 377.11    | Z <sub>3α</sub> <sup>*</sup>   | 710.68    | Z <sub>3β</sub> <sup>2-*</sup>                   | 762.18    | Z <sub>6α</sub> <sup>2-</sup> , Z <sub>6β</sub> <sup>2-</sup>                               |           |                                                              |           |                                                              |           |                                                 |
|           |                                | 680.18    | Y <sub>3β</sub> <sup>2-Δ</sup>                   | 755.68    | Y <sub>5γ</sub> <sup>2-</sup>                                                               |           |                                                              |           |                                                              |           |                                                 |
|           |                                | 640.66    | C <sub>4α</sub> <sup>2-</sup>                    | 741.68    | Y <sub>3β</sub> <sup>2-</sup>                                                               |           |                                                              |           |                                                              |           |                                                 |
|           |                                | 439.11    | Y <sub>3α</sub>                                  | 733.68    | Z <sub>3β</sub> <sup>2-</sup>                                                               |           |                                                              |           |                                                              |           |                                                 |
|           |                                | 421.10    | Y <sub>3α</sub> <sup>*</sup>                     | 640.66    | C <sub>4α</sub> <sup>2-</sup>                                                               |           |                                                              |           |                                                              |           |                                                 |
|           |                                | 377.11    | Z <sub>3α</sub> <sup>*</sup>                     |           |                                                                                             |           |                                                              |           |                                                              |           |                                                 |
|           |                                | 237.06    | C <sub>4β</sub>                                  |           |                                                                                             |           |                                                              |           |                                                              |           |                                                 |
|           |                                | 219.98    | ▼                                                |           |                                                                                             |           |                                                              |           |                                                              |           |                                                 |
|           |                                | 219.05    | B <sub>4β</sub>                                  |           |                                                                                             |           |                                                              |           |                                                              |           |                                                 |
|           |                                | 201.04    | B <sub>4β</sub> <sup>#</sup>                     |           |                                                                                             |           |                                                              |           |                                                              |           |                                                 |

**Table S2.** List of identified ions in Figure 5

| Figure 5a |                                                                  | Figure 5b |                                                                  |
|-----------|------------------------------------------------------------------|-----------|------------------------------------------------------------------|
| m/z       | Fragment                                                         | m/z       | Fragment                                                         |
| 1585.00   | [M-H] <sup>-</sup>                                               | 1585.00   | [M-H] <sup>-</sup>                                               |
| 1506.05   | [M-H] <sup>■-</sup>                                              | 1506.05   | [M-H] <sup>■-</sup>                                              |
| 1487.03   | [M-H] <sup>□-</sup>                                              | 1487.03   | [M-H] <sup>□-</sup>                                              |
| 1429.82   | [M-7] <sup>-</sup> , [M-10] <sup>-</sup> , [M-13] <sup>-</sup>   | 1429.82   | [M-7] <sup>-</sup> , [M-10] <sup>-</sup> , [M-13] <sup>-</sup>   |
| 1400.82   | [M-6] <sup>-</sup> , [M-8] <sup>-</sup> , [M-9] <sup>-</sup>     | 1400.82   | [M-6] <sup>-</sup> , [M-8] <sup>-</sup> , [M-9] <sup>-</sup>     |
| 1385.83   | [M-5] <sup>-</sup>                                               | 1385.83   | [M-5] <sup>-</sup>                                               |
| 1340.80   | [M-1] <sup>-</sup> , [M-3] <sup>-</sup>                          | 1340.80   | [M-1] <sup>-</sup> , [M-3] <sup>-</sup>                          |
| 1158.64   | [M-14] <sup>-</sup>                                              | 1158.64   | [M-14] <sup>-</sup>                                              |
| 890.58    | C <sub>1</sub>                                                   | 890.58    | C <sub>1</sub>                                                   |
| 738.42    | <sup>1,5</sup> X <sub>1</sub>                                    | 738.42    | <sup>1,5</sup> X <sub>1</sub>                                    |
| 710.43    | Y <sub>1</sub>                                                   | 710.43    | Y <sub>1</sub>                                                   |
| 692.42    | [M-5] <sup>2-</sup>                                              | 692.42    | [M-5] <sup>2-</sup>                                              |
| 679.41    | [M-2] <sup>2-</sup> , [M-4] <sup>2-</sup> , [M-11] <sup>2-</sup> | 679.41    | [M-2] <sup>2-</sup> , [M-4] <sup>2-</sup> , [M-11] <sup>2-</sup> |
| 243.20    | 1,3                                                              | 243.20    | 1,3                                                              |

**Table S3.** List of identified ions in Figure 6

| Figure 6a |                                  | Figure 6b |                                  | Figure 6c |                                              | Figure 6d |                                |
|-----------|----------------------------------|-----------|----------------------------------|-----------|----------------------------------------------|-----------|--------------------------------|
| m/z       | Fragment                         | m/z       | Fragment                         | m/z       | Fragment                                     | m/z       | Fragment                       |
| 1726.50   | Y <sub>3β</sub> <sup>■</sup>     | 1726.50   | Y <sub>3β</sub> <sup>■</sup>     | 1980.51   | [M-H] <sup>+</sup>                           | 1980.51   | [M-H] <sup>+</sup>             |
| 1708.49   | Z <sub>3β</sub> <sup>■</sup>     | 1708.49   | Z <sub>3β</sub> <sup>■</sup>     | 1863.46   | Y <sub>6δ</sub>                              | 1788.45   | Z <sub>3β</sub>                |
| 1524.45   | C <sub>6α</sub> <sup>■</sup>     | 1524.45   | C <sub>6α</sub> <sup>■</sup>     | 1823.44   | Y <sub>8α</sub>                              | 1702.42   | Y <sub>7α</sub>                |
| 1506.44   | B <sub>6α</sub> <sup>■</sup>     | 1506.44   | B <sub>6α</sub> <sup>■</sup>     | 1788.45   | Z <sub>3β</sub>                              | 1684.41   | Z <sub>7α</sub>                |
| 1412.35   | B <sub>6α</sub> &Y <sub>5γ</sub> | 1412.35   | B <sub>6α</sub> &Y <sub>5γ</sub> | 1661.39   | Y <sub>7α</sub>                              | 1604.42   | C <sub>6α</sub>                |
| 1332.38   | C <sub>5α</sub>                  | 1332.38   | C <sub>5α</sub>                  | 1643.48   | Z <sub>7α</sub>                              | 1585.39   | B <sub>6α</sub>                |
| 1314.37   | B <sub>5α</sub>                  | 1314.37   | B <sub>5α</sub>                  | 1604.42   | C <sub>6α</sub>                              | 1332.39   | C <sub>5α</sub>                |
| 972.77    | [M-2H] <sup>2-■</sup>            | 972.77    | [M-2H] <sup>2-■</sup>            | 1585.39   | B <sub>6α</sub>                              | 1321.29   | Z <sub>6α</sub>                |
| 902.73    | Y <sub>3β</sub> <sup>2-</sup>    | 902.73    | Y <sub>3β</sub> <sup>2-</sup>    | 1399.32   | <sup>2,4</sup> X <sub>5α</sub>               | 1313.37   | B <sub>5α</sub> <sup>•</sup>   |
| 893.72    | Z <sub>3β</sub> <sup>2-</sup>    | 893.72    | Z <sub>3β</sub> <sup>2-</sup>    | 1330.37   | C <sub>5α</sub> <sup>•</sup>                 | 1175.23   | Y <sub>5α</sub>                |
| 801.70    | C <sub>6α</sub> <sup>2-</sup>    | 801.70    | C <sub>6α</sub> <sup>2-</sup>    | 1313.37   | B <sub>5α</sub> <sup>•</sup>                 | 1159.24   | Z <sub>5α</sub>                |
| 792.70    | B <sub>6α</sub> <sup>2-</sup>    | 792.70    | B <sub>6α</sub> <sup>2-</sup>    | 1012.25   | [M-2H] <sup>2-•</sup>                        | 1012.25   | [M-2H] <sup>2-•</sup>          |
| 601.48    | Y <sub>3β</sub> <sup>3-</sup>    | 601.48    | Y <sub>3β</sub> <sup>3-</sup>    | 931.73    | Y <sub>6δ</sub> <sup>2-</sup>                | 931.73    | Y <sub>8α</sub> <sup>2-</sup>  |
| 526.18    | B <sub>3α</sub>                  | 491.08    | Y <sub>3β</sub> &Y <sub>4α</sub> | 922.72    | Z <sub>6δ</sub> <sup>2-</sup>                | 922.72    | Z <sub>8α</sub> <sup>2-</sup>  |
| 491.08    | Y <sub>3β</sub> &Y <sub>4α</sub> | 341.11    | C <sub>2α</sub>                  | 911.22    | Y <sub>8α</sub> <sup>2-</sup>                | 910.22    | Y <sub>7δ</sub> <sup>2-</sup>  |
| 424.15    | <sup>2,4</sup> A <sub>3α</sub>   | 323.10    | B <sub>2α</sub>                  | 902.73    | Z <sub>3β</sub> <sup>2-</sup>                | 902.73    | Z <sub>3β</sub> <sup>2-</sup>  |
| 237.06    | C <sub>6β</sub>                  | 237.06    | C <sub>6β</sub>                  | 894.23    | Y <sub>3β</sub> <sup>2-</sup>                | 894.23    | Y <sub>3β</sub> <sup>2-</sup>  |
| 219.05    | B <sub>6β</sub>                  | 219.05    | B <sub>6β</sub>                  | 844.19    | <sup>1,5</sup> X <sub>7α</sub> <sup>2-</sup> | 841.7     | Z <sub>7α</sub> <sup>2-</sup>  |
|           |                                  |           |                                  | 830.19    | Y <sub>7α</sub> <sup>2-</sup>                | 711.14    | Y <sub>4α</sub>                |
|           |                                  |           |                                  | 821.19    | Z <sub>7α</sub> <sup>2-</sup>                | 682.14    | <sup>1,5</sup> X <sub>6α</sub> |
|           |                                  |           |                                  | 740.16    | Z <sub>6α</sub> <sup>2-</sup>                | 439.11    | Y <sub>3α</sub>                |
|           |                                  |           |                                  | 711.14    | Y <sub>4α</sub>                              | 237.06    | C <sub>6β</sub>                |
|           |                                  |           |                                  | 695.15    | Z <sub>4α</sub>                              | 219.05    | B <sub>6β</sub>                |
|           |                                  |           |                                  | 439.11    | Y <sub>3α</sub>                              |           |                                |
|           |                                  |           |                                  | 237.06    | C <sub>6β</sub>                              |           |                                |
